# Supplementary material for: Chronic antidepressant potentiates spontaneous activity of dorsal raphe serotonergic neurons by decreasing GABAB receptor-mediated inhibition of L-type calcium channels
Source: PubMed Central journal article supplement (PMC5648823; doi:10.1038/s41598-017-13599-3), 2017-10-19
Supplement: 41598_2017_13599_MOESM1_ESM.pdf [file 41598_2017_13599_MOESM1_ESM.pdf]

**Chronic antidepressant potentiates spontaneous activity of dorsal raphe serotonergic neurons by decreasing GABA<sub>B</sub> receptor-mediated inhibition of L-type calcium channels**

**Nozomi Asaoka<sup>1</sup>, Naoya Nishitani<sup>1</sup>, Haruko Kinoshita<sup>1</sup>, Hiroyuki Kawai<sup>1</sup>, Norihiro Shibui<sup>1</sup>, Kazuki Nagayasu<sup>1\*</sup>, Hisashi Shirakawa<sup>1</sup>, Takayuki Nakagawa<sup>2</sup> & Shuji Kaneko<sup>1\*</sup>**

## Supplementary Figures and Tables

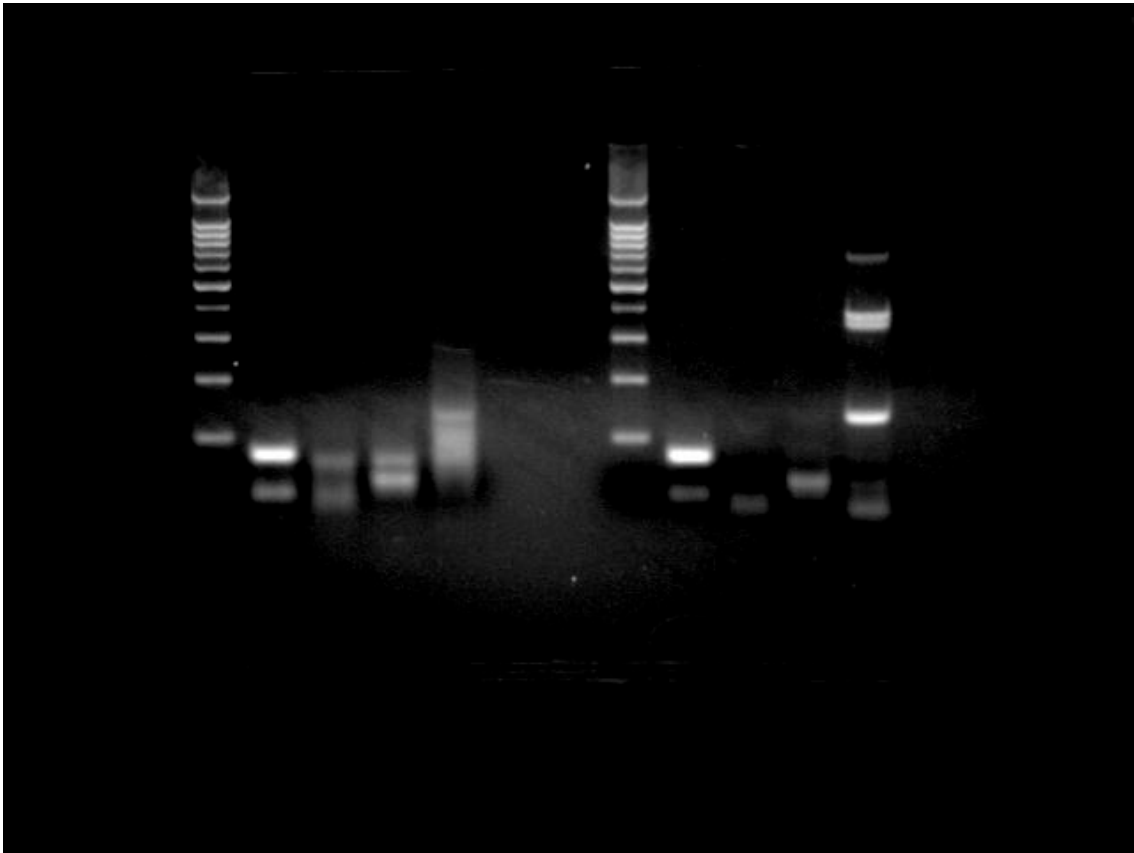

**Supplementary Fig. S1.** Uncropped image of agarose gel electrophoresis shown in Fig.

1a (Right side of the image). PCR Samples (amplicon size in bp): Size marker, Tph2 (83), Gad1 (288), Gad2 (164), Eno2 (144) (from left to right).

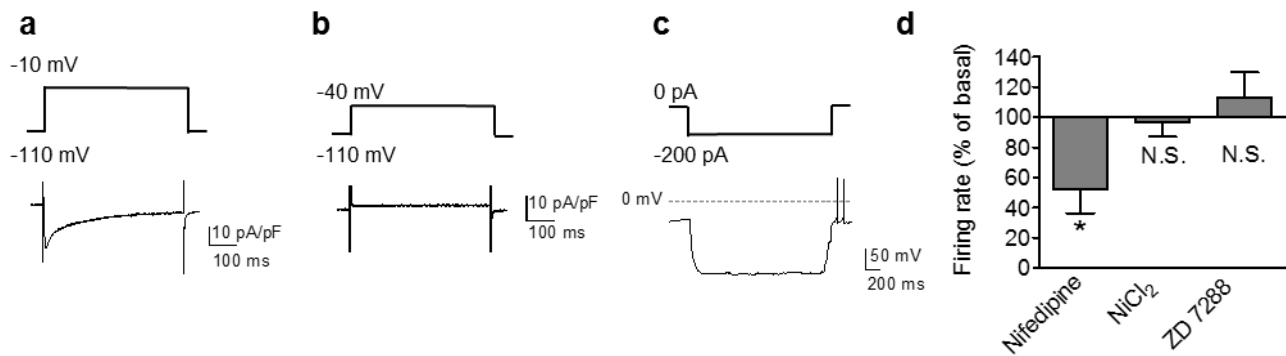

**Supplementary Fig. S2.** L-type voltage dependent voltage-dependent  $\text{Ca}^{2+}$  channel (VDCCs) but not T-type VDCCs and hyperpolarization-activated cyclic nucleotide-gated (HCN) channels modulate serotonergic spontaneous firing activity. (a) Representative trace of high voltage activated (HVA) current evoked by a voltage step from -110 mV to -10 mV. (b) Representative trace of low voltage activated (LVA) current evoked by a voltage step from -110 mV to -40 mV. (c) Representative trace of the membrane potential change by negative current injection (-200 pA). (d) The changes in the spontaneous firing rate before and after the application of nifedipine. \* $P < 0.05$ . (10  $\mu\text{M}$ ,  $n = 5$  neurons from 3 mice,  $P = 0.0363$  by paired  $t$ -test),  $\text{NiCl}_2$  (50  $\mu\text{M}$ ,  $n = 6$  neurons from 2 mice,  $P = 0.7558$  by paired  $t$ -test), or ZD7288 (20  $\mu\text{M}$ ,  $n = 3$  neurons from 2 mice,  $P = 0.5385$  by paired  $t$ -test). Data are presented as the mean  $\pm$  S.E.M.

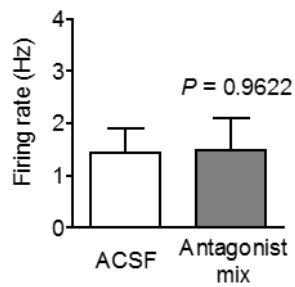

**Supplementary Fig. S3.** Bath application of “antagonist mix” did not affect serotonergic spontaneous firing activity. Serotonergic spontaneous firing activity was recorded in normal ACSF condition or in the presence of antagonist mix (20  $\mu$ M DNQX, 50  $\mu$ M APV, 20  $\mu$ M bicuculline, 0.1  $\mu$ M WAY100635, and 1  $\mu$ M GR127935). (Water,  $n = 13$  neurons from 5 mice; Cit,  $n = 9$  neurons from 3 mice,  $P = 0.9622$  vs. Water by Student’s  $t$ -test,.) Data are presented as the mean  $\pm$  S.E.M.

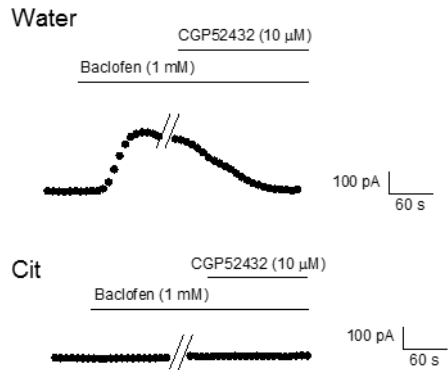

**Supplementary Fig. S4.** Chronic administration of citalopram decreased postsynaptic GABA<sub>B</sub> receptor signaling in serotonergic neurons. Representative traces of baclofen (1 mM)-induced current in serotonergic neurons from drug-naïve (Water) and citalopram-treated (Cit) mice. The holding voltage was set at -50 mV. \* $P < 0.05$  vs. Water. (Similar responses were observed at least 4 times).

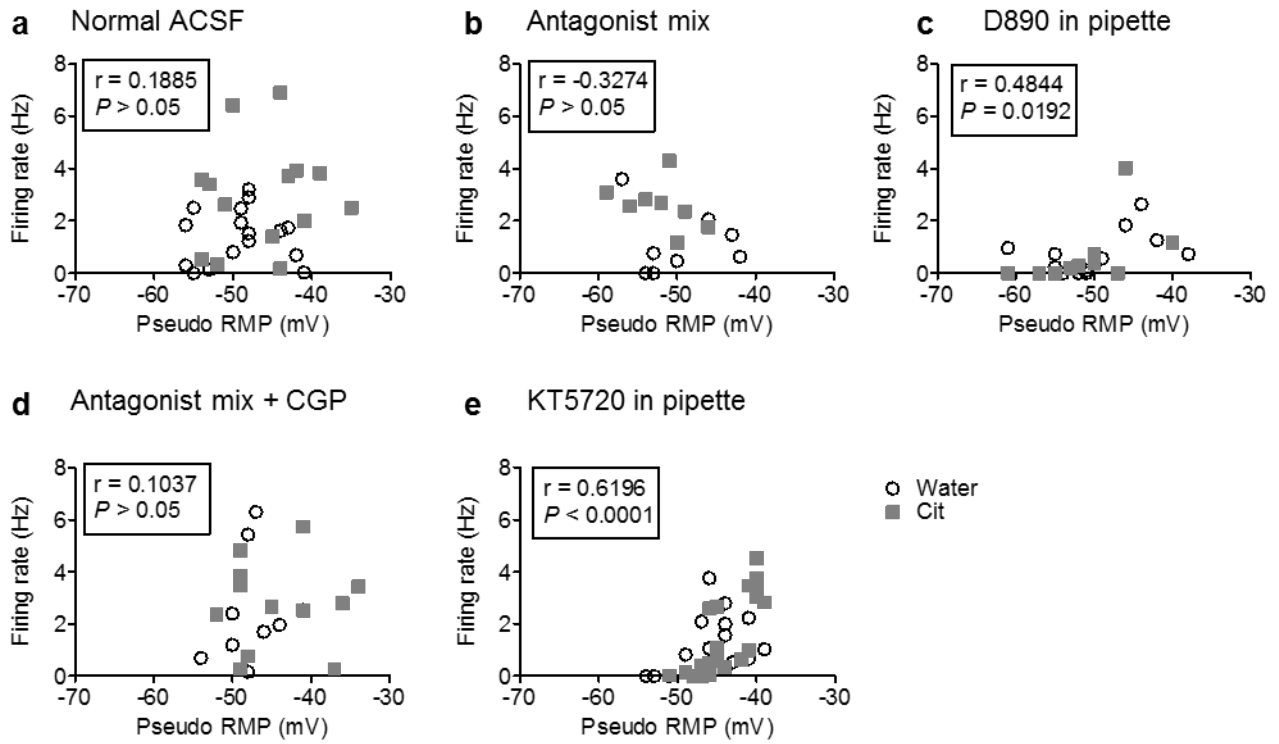

**Supplementary Fig. S5.** Relationship between spontaneous firing rate and pseudo RMP

of serotonergic neurons from drug-naïve (Water) and citalopram-treated (Cit) mice.

Spontaneous firing rate was plotted versus pseudo RMP and Pearson correlation

analysis were used to determine the relationship.

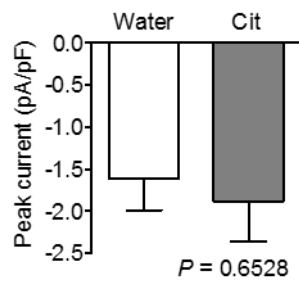

**Supplementary Fig. S6.** Chronic administration of citalopram did not affect low voltage activated (LVA) VDCC current. LVA VDCC current in serotonergic neurons was recorded by a voltage step from -110 mV to -40 mV. (Water,  $n = 9$  neurons from 3 mice; Cit,  $n = 9$  neurons from 4 mice,  $P = 0.6528$  vs. Water by Student's  $t$ -test.) Data are presented as the mean  $\pm$  S.E.M.

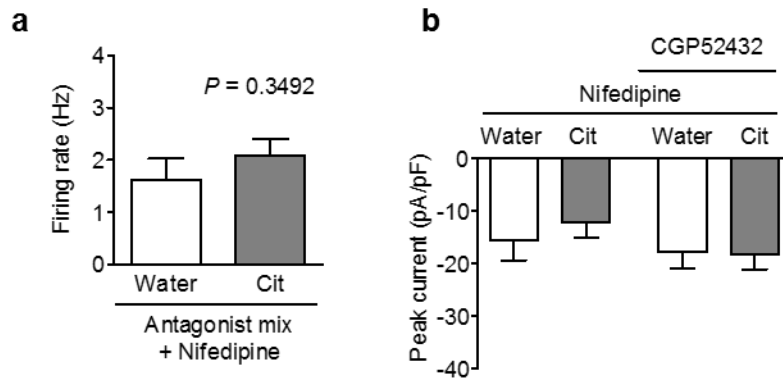

**Supplementary Fig. S7.** Nifedipine blocked the increasing effects of citalopram on spontaneous firing activity and VDCC current. **(a)** Effects of nifedipine on the spontaneous firing rate of DRN serotonergic neurons. (Water,  $n = 18$  neurons from 4 mice; Cit,  $n = 25$  neurons from 5 mice,  $P = 0.3492$  vs. Water by Student's  $t$ -test.) **(b)** Effects of nifedipine and CGP52432 on HVA VDCC current in DRN serotonergic neurons from drug-naïve (Water) and citalopram-treated (Cit) mice. (one-way ANOVA;  $F_{3,34} = 0.7042$ ,  $P = 0.5562$ ; Tukey's Multiple Comparison Test;  $P > 0.05$  (all pairs); Water (Nifedipine),  $n = 7$  neurons from 3 mice; Cit (Nifedipine),  $n = 8$  neurons from 3 mice; Water (Nifedipine + CGP),  $n = 13$  neurons from 2 mice; Cit (Nifedipine + CGP),  $n = 10$  neurons from 2 mice). Data are presented as the mean  $\pm$  S.E.M.



|                   | Spontaneous firing frequency (Hz)  | Pseudo RMP (mV)         | AP threshold (mV)       | AP amplitude (mV)      | AP duration (ms)                         | AHP amplitude (mV)      |
|-------------------|------------------------------------|-------------------------|-------------------------|------------------------|------------------------------------------|-------------------------|
| Control           | 1.1 ± 0.3<br>(n = 8)               | -47.9 ± 1.6<br>(n = 8)  | -38.0 ± 1.7<br>(n = 7)  | 86.2 ± 2.6<br>(n = 7)  | 3.1 ± 0.3<br>(n = 7)                     | -20.8 ± 1.4<br>(n = 7)  |
| CGP52432          | 2.8 ± 0.5 <sup>1</sup><br>(n = 11) | -43.3 ± 1.2<br>(n = 11) | -36.0 ± 0.7<br>(n = 10) | 78.7 ± 1.6<br>(n = 10) | 2.6 ± 0.1<br>(n = 10)                    | -18.4 ± 0.7<br>(n = 10) |
| CGP52432 + KT5720 | 0.9 ± 0.4 <sup>2</sup><br>(n = 10) | -46.2 ± 1.3<br>(n = 10) | -37.7 ± 1.3<br>(n = 7)  | 77.7 ± 7.0<br>(n = 7)  | 3.0 ± 0.3<br>(n = 7)                     | -17.6 ± 0.7<br>(n = 7)  |
| CGP52432 + D890   | 0.9 ± 0.3 <sup>2</sup><br>(n = 12) | -46.2 ± 0.7<br>(n = 12) | -35.4 ± 1.1<br>(n = 10) | 74.0 ± 2.8<br>(n = 10) | 5.2 ± 0.4 <sup>1, 2, 3</sup><br>(n = 10) | -19.0 ± 0.8<br>(n = 10) |

1;  $P < 0.05$  compared to "control" group. 2;  $P < 0.05$  compared to "CGP52432" group.

3;  $P < 0.05$  compared to "CGP52432 + KT5720" group.

The differences were compared by one-way analysis of variance (ANOVA) with post hoc Tukey's Multiple Comparison Test.

### Supplementary Table S1 Electrophysiological characters of serotonergic neurons

related to Figure 3.

|                           |                | Spontaneous firing frequency (Hz)  | Pseudo RMP (mV)         | AP threshold (mV)                    | AP amplitude (mV)      | AP duration (ms)      | AHP amplitude (mV)      |
|---------------------------|----------------|------------------------------------|-------------------------|--------------------------------------|------------------------|-----------------------|-------------------------|
| ACSF                      | Water          | 1.5 ± 0.4<br>(n = 8)               | -47.7 ± 1.4<br>(n = 8)  | -36.4 ± 1.3<br>(n = 7)               | 85.6 ± 1.9<br>(n = 7)  | 2.7 ± 0.2<br>(n = 7)  | -23.0 ± 1.3<br>(n = 7)  |
|                           | Cit            | 3.1 ± 0.5 <sup>1</sup><br>(n = 13) | -45.8 ± 1.7<br>(n = 13) | -34.8 ± 1.3<br>(n = 13)              | 80.4 ± 1.7<br>(n = 13) | 2.8 ± 0.1<br>(n = 13) | -23.6 ± 1.0<br>(n = 13) |
|                           | <i>P</i> value | <i>P</i> = 0.0394                  | <i>P</i> > 0.05         | <i>P</i> > 0.05                      | <i>P</i> > 0.05        | <i>P</i> > 0.05       | <i>P</i> > 0.05         |
| Antagonist mix            | Water          | 1.1 ± 0.4<br>(n = 8)               | -49.7 ± 1.9<br>(n = 8)  | -38.3 ± 2.2<br>(n = 6)               | 83.8 ± 2.4<br>(n = 6)  | 2.7 ± 0.1<br>(n = 6)  | -22.7 ± 1.0<br>(n = 6)  |
|                           | Cit            | 2.6 ± 0.3 <sup>1</sup><br>(n = 8)  | -52.1 ± 1.4<br>(n = 8)  | -42.2 ± 2.1<br>(n = 8)               | 87.3 ± 2.0<br>(n = 8)  | 2.5 ± 0.1<br>(n = 8)  | -22.0 ± 1.0<br>(n = 8)  |
|                           | <i>P</i> value | <i>P</i> = 0.0168                  | <i>P</i> > 0.05         | <i>P</i> > 0.05                      | <i>P</i> > 0.05        | <i>P</i> > 0.05       | <i>P</i> > 0.05         |
| D890 in pipette           | Water          | 0.7 ± 0.2<br>(n = 13)              | -50.7 ± 1.9<br>(n = 13) | -40.9 ± 2.4<br>(n = 9)               | 76.3 ± 4.0<br>(n = 9)  | 4.7 ± 0.4<br>(n = 9)  | -20.3 ± 2.0<br>(n = 9)  |
|                           | Cit            | 0.7 ± 0.4<br>(n = 10)              | -51.1 ± 1.9<br>(n = 10) | -39.1 ± 2.2<br>(n = 6)               | 68.0 ± 3.0<br>(n = 6)  | 4.1 ± 0.6<br>(n = 6)  | -16.0 ± 2.0<br>(n = 6)  |
|                           | <i>P</i> value | <i>P</i> > 0.05                    | <i>P</i> > 0.05         | <i>P</i> > 0.05                      | <i>P</i> > 0.05        | <i>P</i> > 0.05       | <i>P</i> > 0.05         |
| Antagonist mix + CGP52432 | Water          | 2.5 ± 0.7<br>(n = 9)               | -47.5 ± 1.2<br>(n = 9)  | -40.9 ± 1.2<br>(n = 9)               | 80.3 ± 1.1<br>(n = 9)  | 3.0 ± 0.3<br>(n = 9)  | -18.1 ± 1.3<br>(n = 9)  |
|                           | Cit            | 2.7 ± 0.5<br>(n = 12)              | -44.2 ± 1.8<br>(n = 12) | -36.2 ± 1.9<br>(n = 12)              | 74.5 ± 2.9<br>(n = 12) | 3.0 ± 0.2<br>(n = 12) | -16.1 ± 0.5<br>(n = 12) |
|                           | <i>P</i> value | <i>P</i> > 0.05                    | <i>P</i> > 0.05         | <i>P</i> > 0.05                      | <i>P</i> > 0.05        | <i>P</i> > 0.05       | <i>P</i> > 0.05         |
| KT5720 in pipette         | Water          | 1.2 ± 0.3<br>(n = 16)              | -46.6 ± 1.2<br>(n = 16) | -38.5 ± 1.0<br>(n = 11)              | 83.5 ± 2.9<br>(n = 11) | 2.7 ± 0.2<br>(n = 11) | -17.9 ± 1.0<br>(n = 11) |
|                           | Cit            | 1.4 ± 0.3<br>(n = 22)              | -44.1 ± 0.7<br>(n = 22) | -35.7 ± 0.6 <sup>1</sup><br>(n = 20) | 79.9 ± 2.3<br>(n = 20) | 2.7 ± 0.1<br>(n = 20) | -16.9 ± 0.5<br>(n = 20) |
|                           | <i>P</i> value | <i>P</i> > 0.05                    | <i>P</i> > 0.05         | <i>P</i> = 0.0161                    | <i>P</i> > 0.05        | <i>P</i> > 0.05       | <i>P</i> > 0.05         |

<sup>1</sup>; *P* < 0.05 compared to "Water (drug-naïve)" group.  
The differences were compared by paired t-test.

**Supplementary Table S2** Electrophysiological characters of serotonergic neurons from drug-naïve or citalopram-treated mice.
